# Supplementary material for: Value of circulating cell-free DNA analysis as a diagnostic tool for breast cancer: a meta-analysis
Source: PubMed Central journal article supplement (PMC5432284; doi:10.18632/oncotarget.15775), 2017-02-28
Supplement: oncotarget-08-26625-s001.pdf [file oncotarget-08-26625-s001.pdf]

## Value of circulating cell-free DNA analysis as a diagnostic tool for breast cancer: a meta-analysis

### Supplementary Materials

**Supplementary Table 1: Summary of sensitivity, specificity, PLR, NLR, DOR, AUC, LRT-I<sup>2</sup>, LRT-Q, Spearman coefficient of study groups**

|                                       | Studies               | Sensitivity      | Specificity        | PLR                    | NLR                    |
|---------------------------------------|-----------------------|------------------|--------------------|------------------------|------------------------|
| Breast cancer versus healthy controls |                       |                  |                    |                        |                        |
| Overall                               | 24                    | 0.70 (0.68–0.72) | 0.87 (0.85–0.89)   | 6.22 (4.31–8.99)       | 0.25 (0.17–0.36)       |
| Quantitative                          | 14                    | 0.78 (0.75–0.80) | 0.83 (0.81–0.86)   | 4.83 (3.37–6.91)       | 0.22 (0.13–0.35)       |
| Quant. Omit 3                         | 11                    | 0.79 (0.77–0.82) | 0.83 (0.80–0.85)   | 5.07 (3.32–7.75)       | 0.17 (0.09–0.32)       |
| Qualitative                           | 10                    | 0.50 (0.45–0.54) | 0.98 (0.96–0.99)   | 16.52 (8.65–31.58)     | 0.32 (0.19–0.54)       |
| Qual. Omit 4                          | 6                     | 0.88 (0.81–0.93) | 0.98 (0.95–0.99)   | 24.46 (11.38–52.58)    | 0.14 (0.07–0.28)       |
| Breast cancer versus benign disease   |                       |                  |                    |                        |                        |
| Overall                               | 8                     | 0.75 (0.71–0.79) | 0.79 (0.73–0.84)   | 2.40 (1.13–5.12)       | 0.29 (0.12–0.74)       |
|                                       | DOR                   | AUC              | LRT-I <sup>2</sup> | LRT-Q                  | Spearman               |
| Breast cancer versus healthy controls |                       |                  |                    |                        |                        |
| Overall                               | 32.31 (17.35–60.18)   | 0.9314           | 78.60%             | 107.52 ( $P < 0.001$ ) | –0.061 ( $p = 0.777$ ) |
| Quantitative                          | 24.40 (12.07–49.31)   | 0.9116           | 84.30%             | 82.76 ( $P < 0.001$ )  | –0.191 ( $p = 0.513$ ) |
| Quant. Omit 3                         | 31.91 (13.65–74.62)   | 0.9193           | 87.40%             | 74.40 ( $P < 0.001$ )  | –0.391 ( $p = 0.235$ ) |
| Qualitative                           | 68.45 (19.29–242.85)  | 0.9919           | 49.80%             | 17.94 ( $P = 0.036$ )  | –0.383 ( $p = 0.275$ ) |
| Qual. Omit 4                          | 256.60 (77.40–850.69) | 0.9886           | 0.00%              | 1.23 ( $P = 0.942$ )   | 0.029 ( $p = 0.957$ )  |
| Breast cancer versus benign disease   |                       |                  |                    |                        |                        |
| Overall                               | 9.49 (1.76–51.03)     | 0.8213           | 91.20%             | 79.25 ( $P < 0.001$ )  | –0.096 ( $p = 0.821$ ) |

PLR = positive likely ratio; NLR = negative likely ratio; DOR = diagnostic odds ratio; AUC = area under curve; LRT = likelihood ratio test; Spearman = Spearman correlation coefficient.
